# Supplementary material for: Clustering and Differential Alignment Algorithm: Identification of Early Stage Regulators in the Arabidopsis thaliana Iron Deficiency Response
Source: PubMed Central journal article supplement (PMC4552565; doi:10.1371/journal.pone.0136591), 2015-08-28

# Dissimilarity tables

## bHLH115

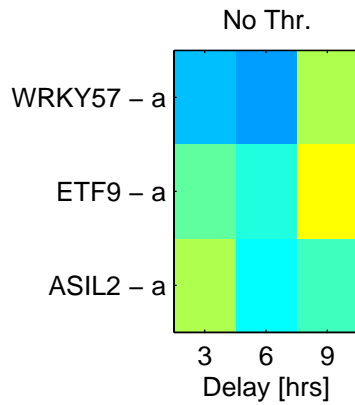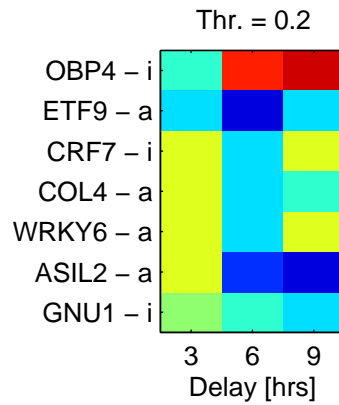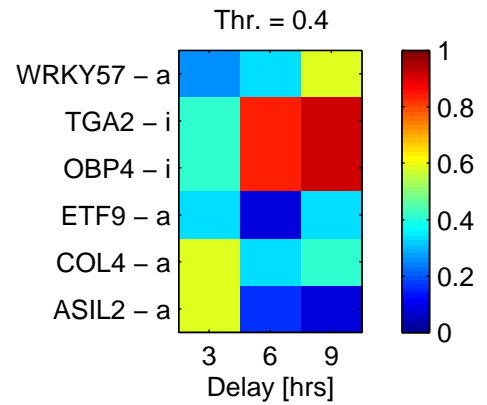

## MYB72

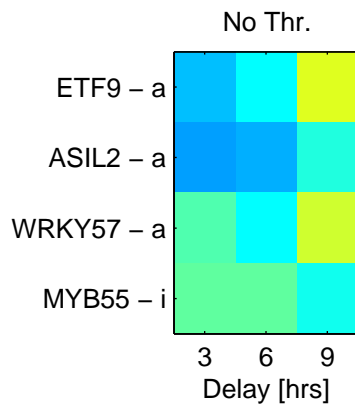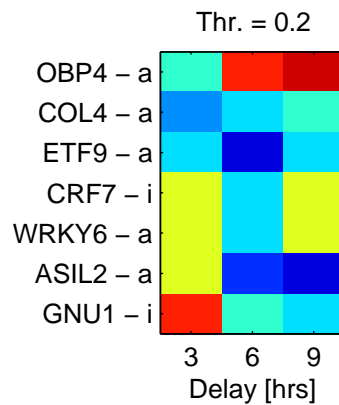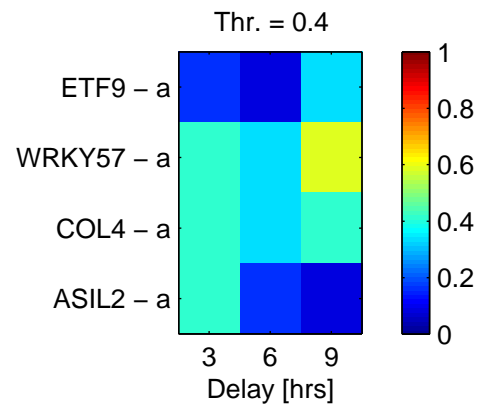

## MYB10

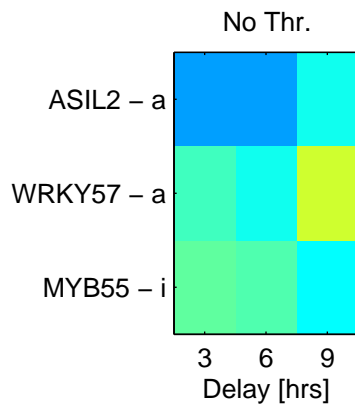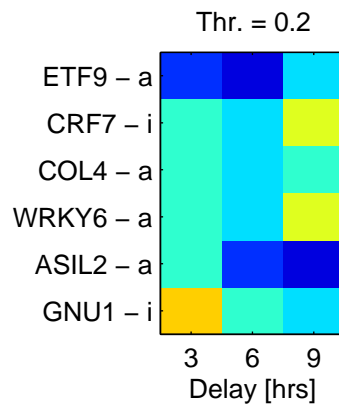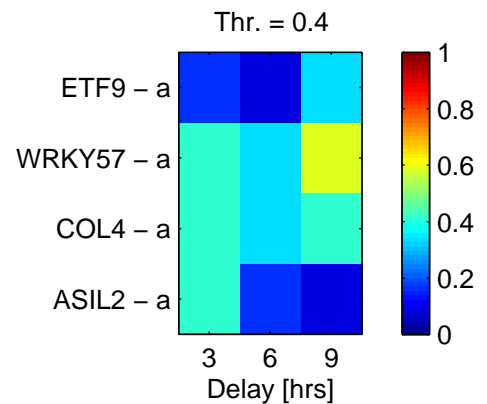

### PYE

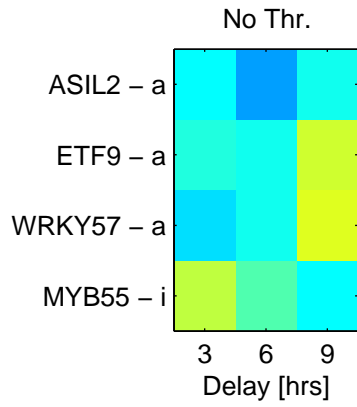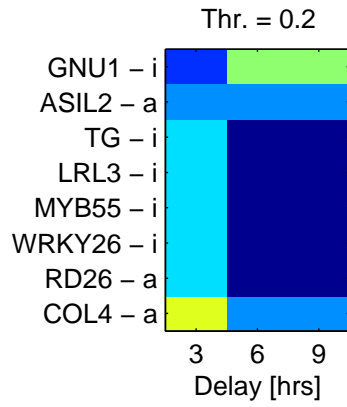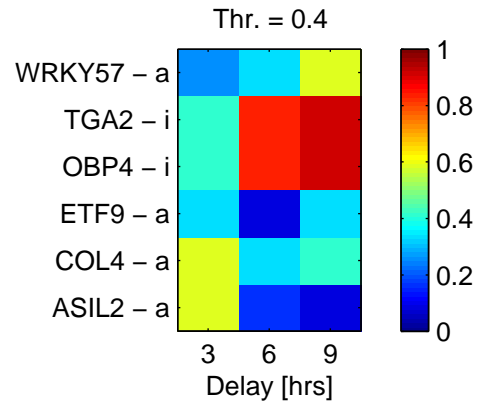

### bHLH101

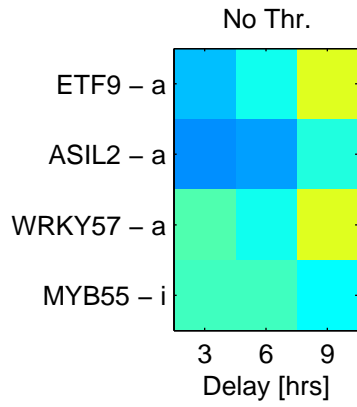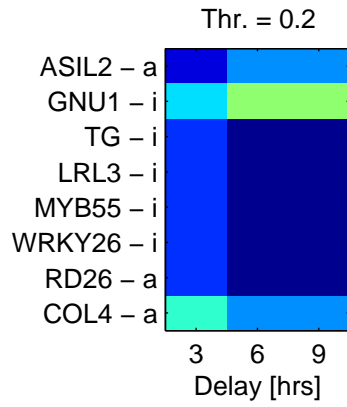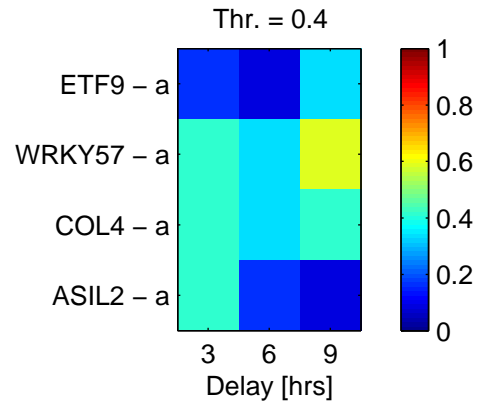

### bHLH39

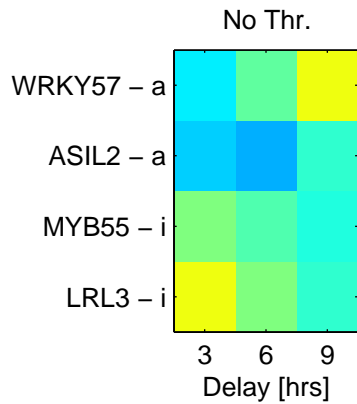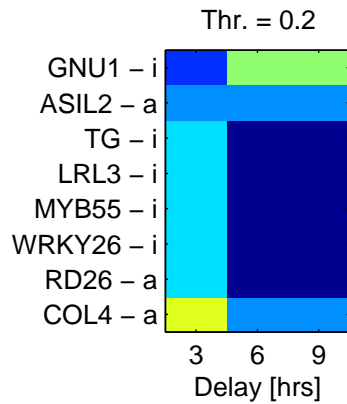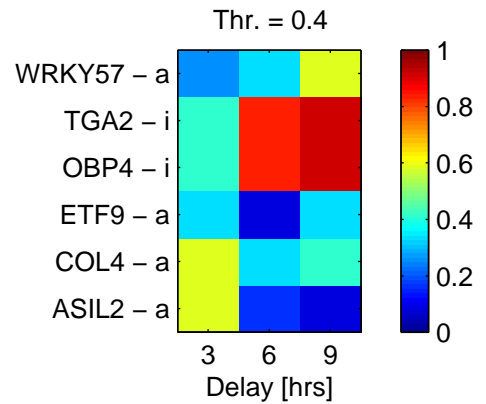

# BTS

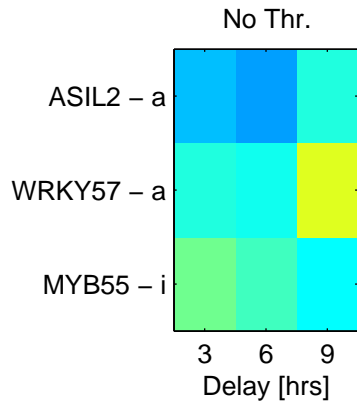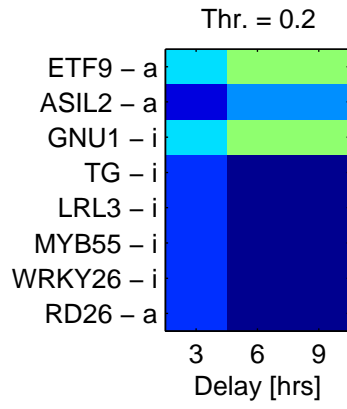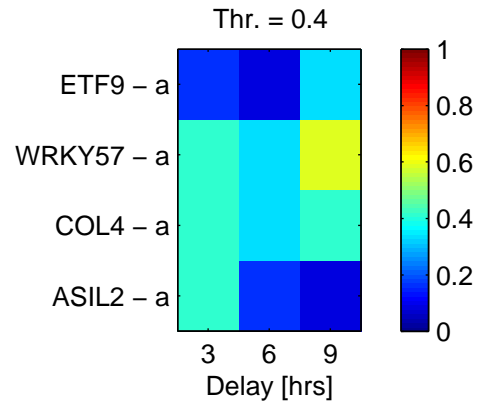

Supplement: pone.0136591.s014.pdf [file pone.0136591.s014.pdf]
